# Supplementary material for: miR-22 inhibits tumor growth and metastasis by targeting ATP citrate lyase: evidence in osteosarcoma, prostate cancer, cervical cancer and lung cancer
Source: PubMed Central journal article supplement (PMC5190093; doi:10.18632/oncotarget.10020), 2016-06-14
Supplement: oncotarget-07-44252-s001.pdf [file oncotarget-07-44252-s001.pdf]

## miR-22 inhibits tumor growth and metastasis by targeting ATP citrate lyase: evidence in osteosarcoma, prostate cancer, cervical cancer and lung cancer

### SUPPLEMENTARY FIGURES AND TABLE

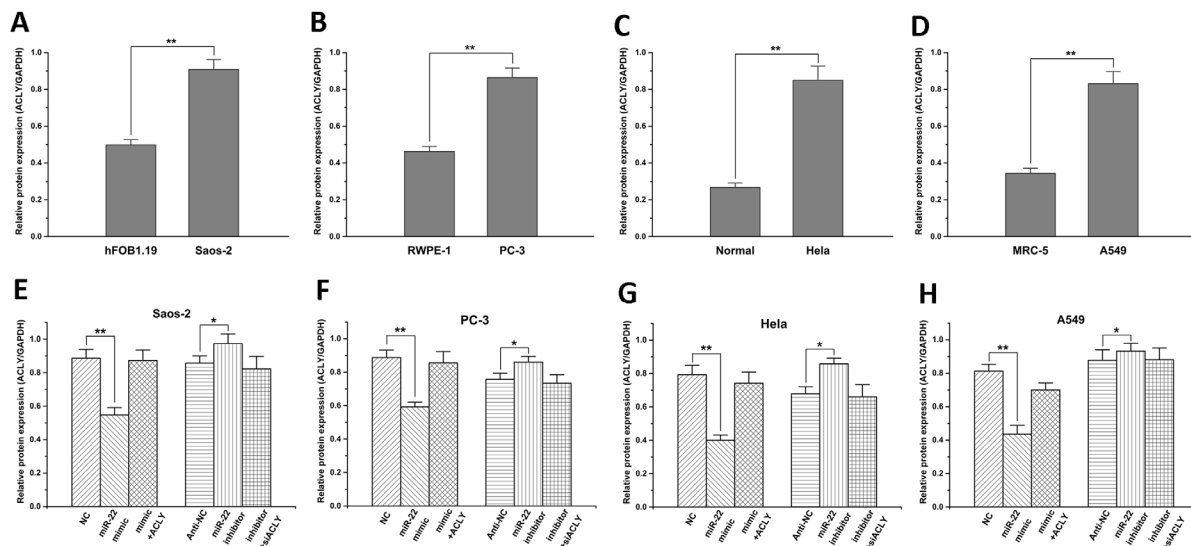

**Supplementary Figure S1: A-D.** Data represented the relative expression of ACLY protein levels (standardized to the intensity of GAPDH) in Saos-2, PC-3, HeLa and A549 cells and their normal controls (\*\* $P < 0.01$ ). **E-H.** Data represented the relative expression of ACLY protein levels (standardized to the intensity of GAPDH) in the four cancer cell lines treated with miR-22 mimic or miR-22 inhibitor as well as cotransfected by ACLY-overexpressed vector or siRNA (\* $P < 0.05$ , \*\* $P < 0.01$ ).

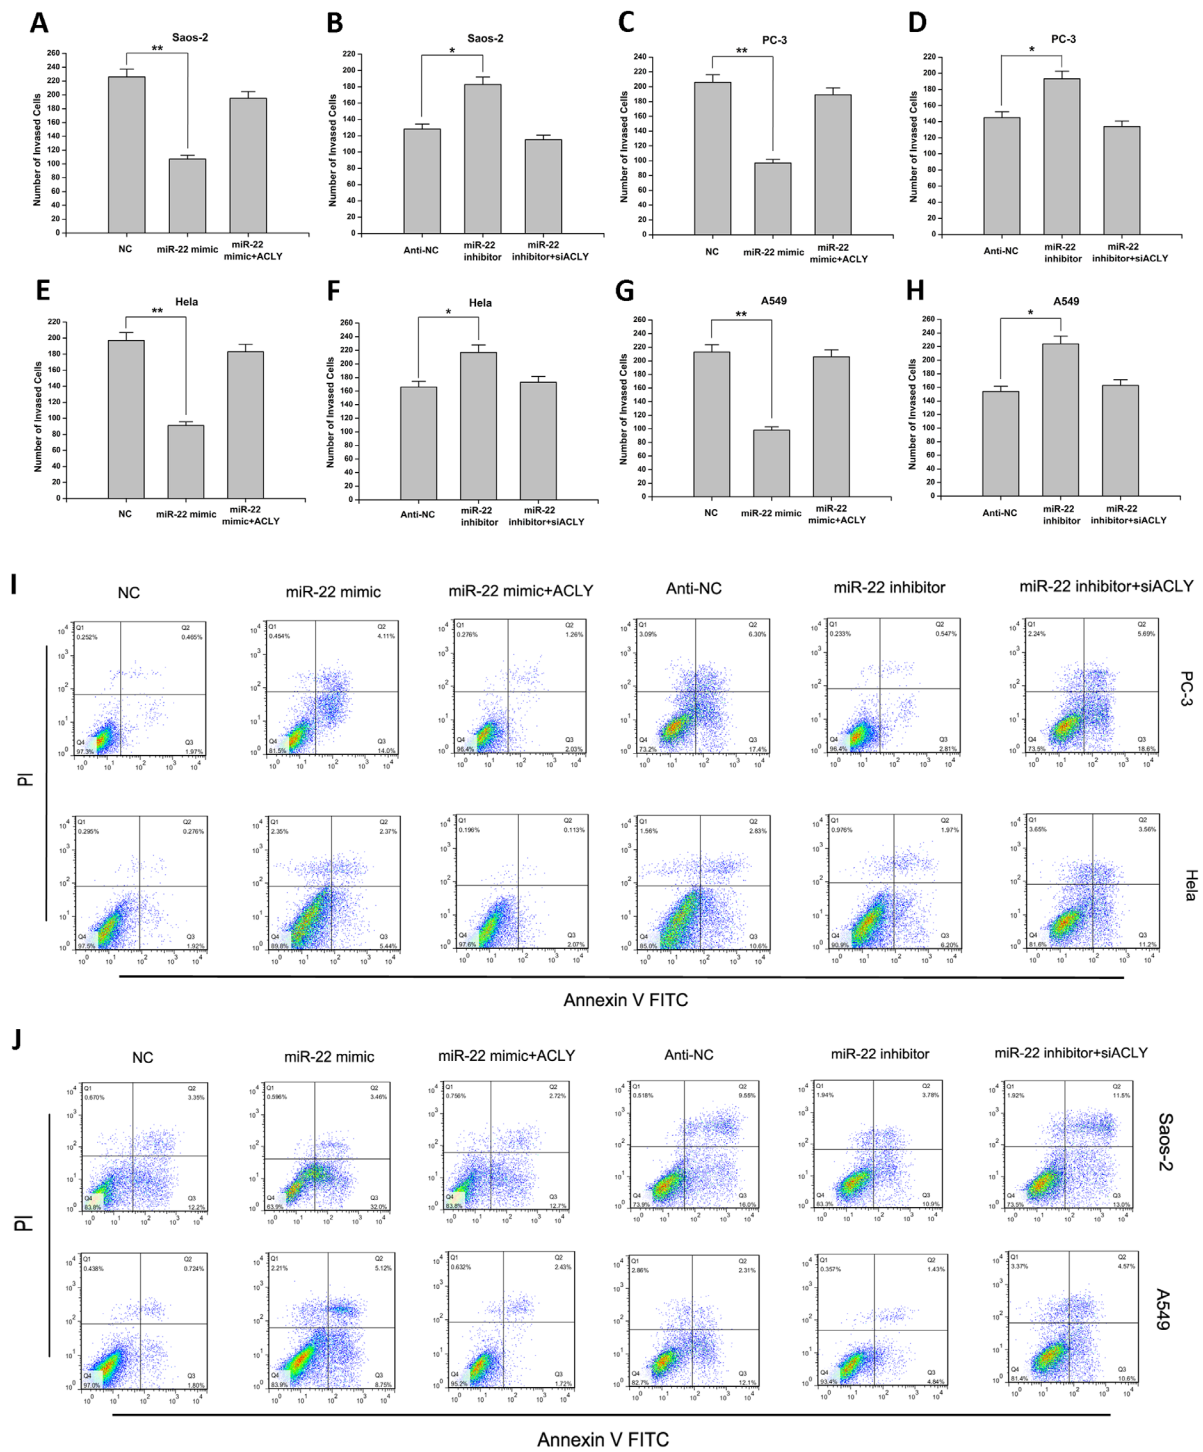

**Supplementary Figure S2: A-H.** Data represented the counted number of the invaded cells during the transwell assay (\* $P < 0.05$ , \*\* $P < 0.01$ ). **I and J.** Saos-2, PC-3, HeLa and A549 cells were transfected with the miR-22 mimic or inhibitor, double-stained by Annexin V / PI and examined by flow cytometry for cell apoptosis.

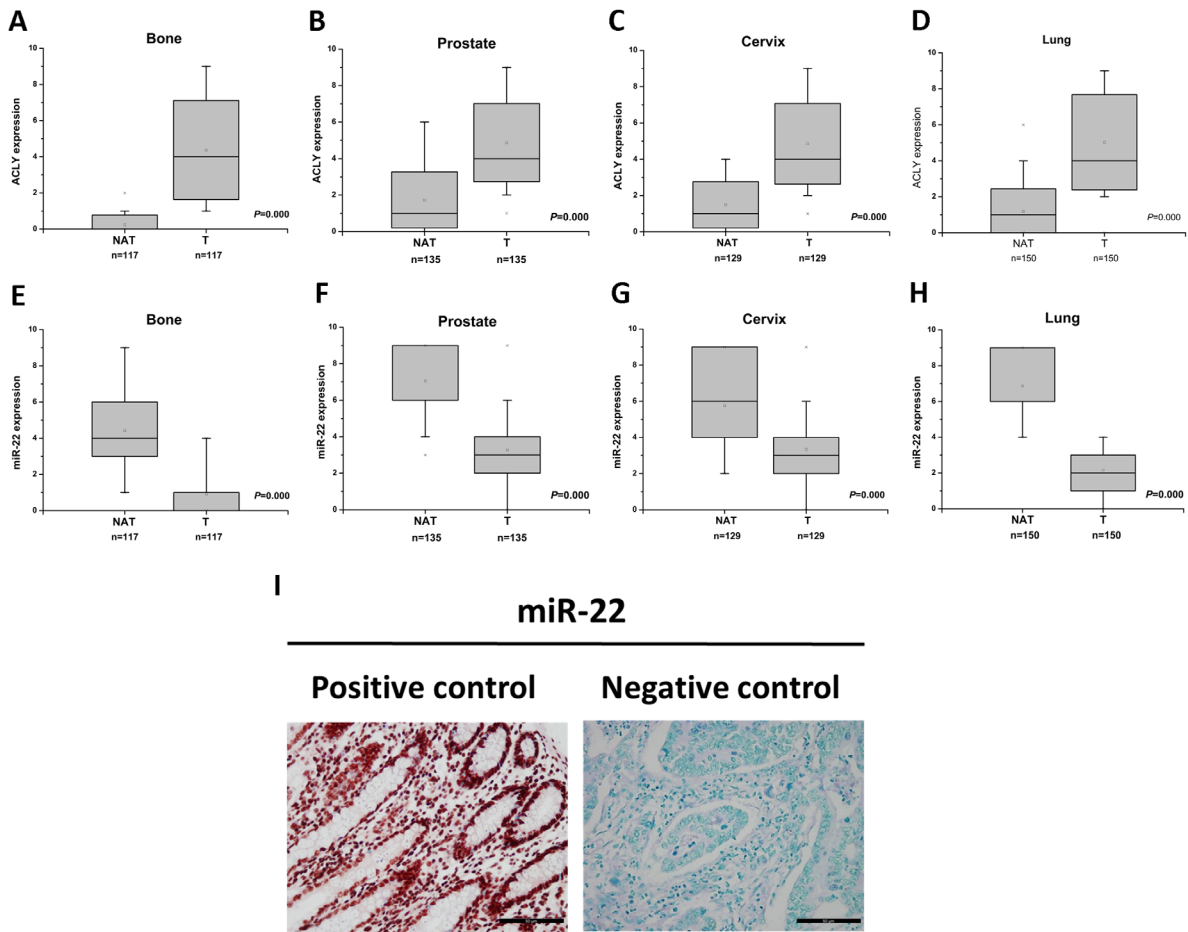

**Supplementary Figure S3:** A-D. Data represented the distribution of ACLY staining scores between the NAT samples and the tumor tissues (T). E-H. Data represented the distribution of the miR-22 expression between the NAT and T samples. I. Positive control and negative control stainings of miR-22 detected by RISH (400X, scale bar 50  $\mu$ m).

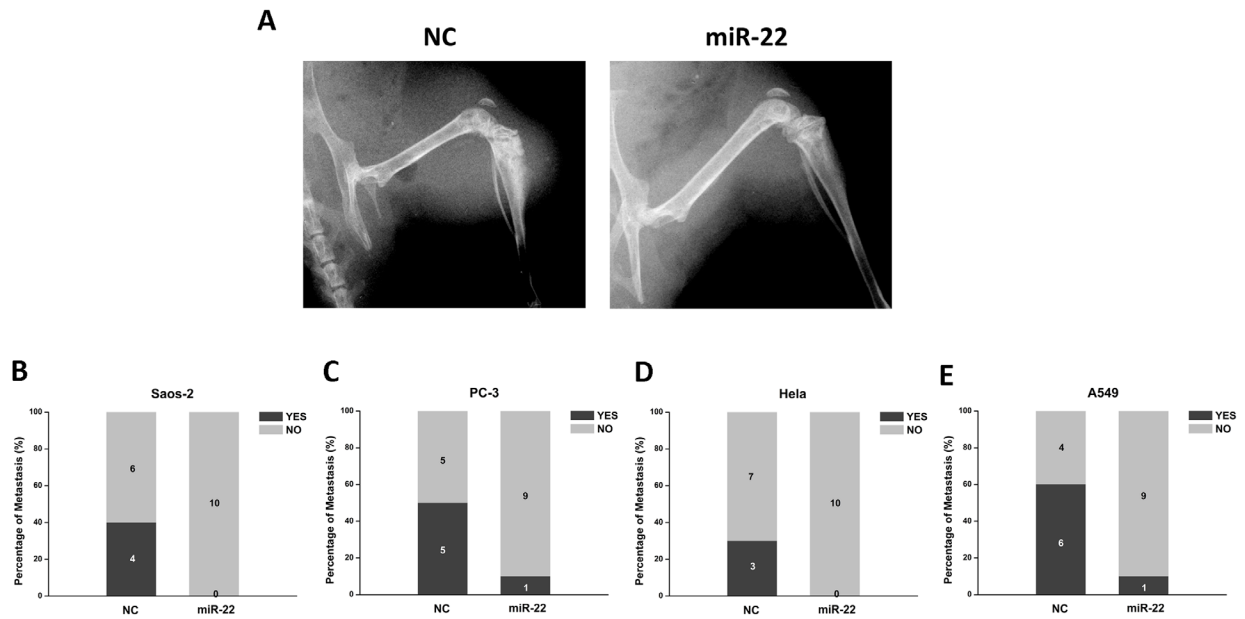

**Supplementary Figure S4:** **A.** Representative X-ray images of the *in vivo* orthotopic osteosarcoma model treated by NC or miR-22, separately. **B-E.** The percentages of distant metastasis after the different miRNA treatments in the four *in vivo* tumor models.

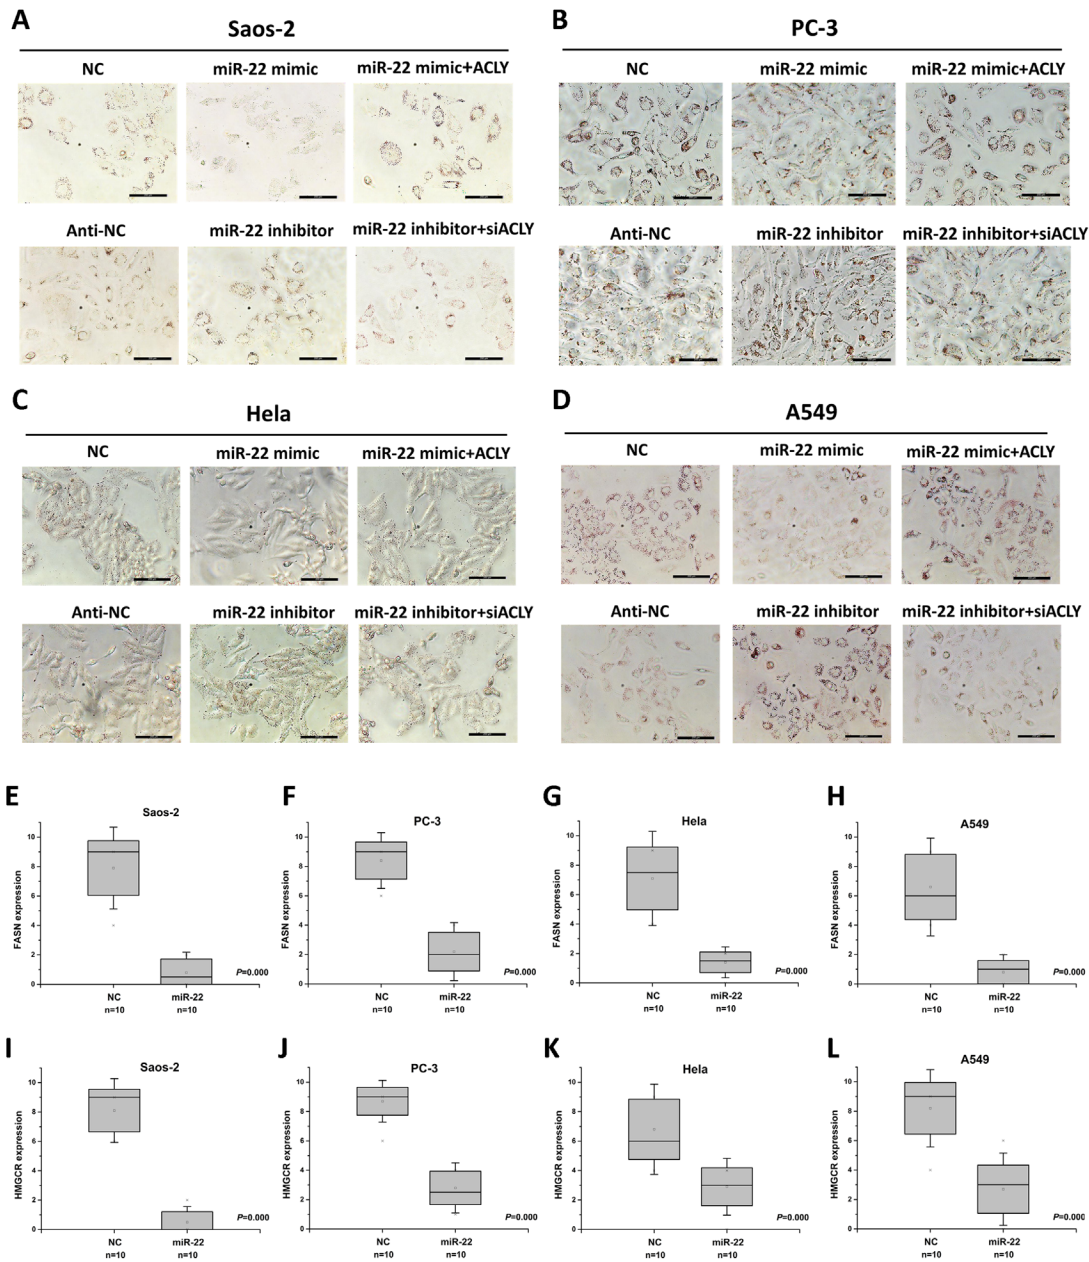

**Supplementary Figure S5: A-D.** Oil red staining pictures of Saos-2, PC-3, HeLa and A549 cells transfected with the miR-22 mimic or inhibitor (200X, scale bar 100 μm). **E-L.** Data represented the distribution of FASN or HMGR IHC staining scores of the mice tumor tissues between the NC and miR-22 groups.

**Supplementary Table S1: Primer sequences used in real-time PCR and the plasmid construction; sequences of siRNA and agomiR fragments**

| <b>Primers for quantitative real-time PCR</b>        |                                                |                                                                         |
|------------------------------------------------------|------------------------------------------------|-------------------------------------------------------------------------|
|                                                      | Sense Primer (5' to 3')                        | Antisense Primer (5' to 3')                                             |
| miR-22                                               | CCAGCTAAAGCTGC<br>CAGTTGAAGAAGCTG              | Uni-miR qPCR Primer supplied by the SYBR PrimeScript miRNA RT-PCR kit   |
| miR-27a                                              | CGTGTTACAGTGGCTAAGTTCCGC                       | <i>Vide supra</i>                                                       |
| miR-27b                                              | CGCTTTGTTTACA<br>GTGGCTAAGTTCTGC               | <i>Vide supra</i>                                                       |
| U6                                                   | CTCGCTTCGGCAGCACA                              | AACGCTTCACGAATTTGCGT                                                    |
| FASN                                                 | TATGAAGCCATCGTGGACGG                           | CATGCTGTAGCCCACGAGT                                                     |
| HMGCR                                                | GCCCTCAGTTCCAACCTCACA                          | TTCAAGCTGACGTACCCCTG                                                    |
| GAPDH                                                | GAAACCAGATCTCCACCGCA                           | GCGCCCAATACGACCAAATC                                                    |
| <b>Primers for quantitative plasmid construction</b> |                                                |                                                                         |
|                                                      | Sense Primer (5' to 3')                        | Antisense Primer (5' to 3')                                             |
| ACLY                                                 | ATGTCGGCCAAGGCAATTC ( <i>HindIII</i> )         | CATGCTCATGTGTTCCGGAA ( <i>EcoRI</i> )                                   |
| ACLY 3'UTR-WT                                        | CAGAGCCAGGAA<br>CCCTACTGCAGTAA ( <i>XhoI</i> ) | TTGTTACTATATAGTTTATTTAA<br>ACCAGACTATGATAATACAGAGAAG<br>( <i>NotI</i> ) |
| ACLY 3'UTR-Mut                                       | GTAATCCACAAAGATTCTG<br>GCGTGCTGCCACCTCAGTCTCTC | GAAGAGACTGAGGTGGCA<br>GCACGCCAGAATCTTTGTGGATTAC                         |
| <b>siRNA and agomiR fragments</b>                    |                                                |                                                                         |
|                                                      | Sense Primer (5' to 3')                        | Antisense Primer (5' to 3')                                             |
| siACLY                                               | GCGUGGAUGAGAAACUGAATT                          | UUCAGUUUCUCAUCCACGCTT                                                   |
| miR-22 agomiR                                        | AAGCUGCCAGUUGAAGAACUGU                         | AGUUCUUAACUGGCAGCUUUU                                                   |
| NC agomiR                                            | UUCUCCGAACGUGUCACGUTT                          | ACGUGACACGUUCGGAGAATT                                                   |
